# Supplementary material for: Micro-Raman and X-ray Photoemission Spectroscopic Investigations of Heterojunction Between Delafossite CuGaO2 and Wurtzite ZnO Obtained by Hydrothermal Method
Source: Research Square preprint supplement (doi:10.21203/rs.3.rs-1367416/v1), 2022-03-08
Supplement: Supplementary file 1 [file 890a1df1df6a9a42e9c59315.docx]

**Supporting Information**

**Micro-Raman and X-ray photoemission spectroscopic investigations of heterojunction between delafossite CuGaO2 and wurtzite ZnO obtained by hydrothermal method**

Minuk Choi1, Christoph Brabec2 and, Tomokatsu Hayakawa1,3*

1 Field of Advanced Ceramics, Department of Life Science and Applied Chemistry

Nagoya Institute of Technology, Gokiso, Showa, Nagoya 466-8555, Japan

2 Department of Materials Science and Engineering, University of Erlangen-Nuremberg, Martensstraße 7, DE-91058 Erlangen, Germany

3 Frontier Research Institute of Materials Science (FRIMS), Nagoya Institute of Technology, Gokiso, Showa, Nagoya 466-8555, Japan

*Corresponding author


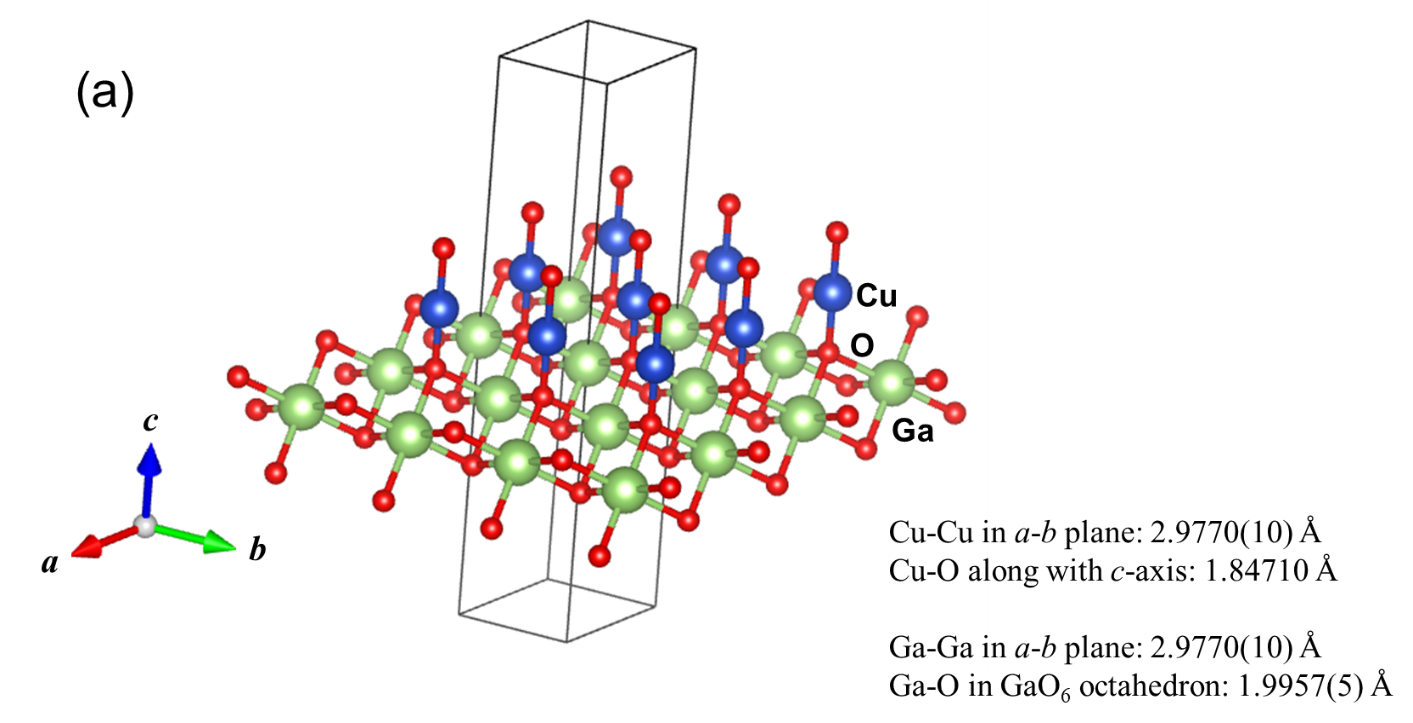


**Fig.S1(a)** Extracted crystal structure of rhombohedral CuGaO2 (R-3m). Blue, red, and green balls

show Cu, O, Ga elements, respectively. The lattice parameters are taken from ICDD PDF 01-082-8561.

**Fig.S1(a)** shows crystal structure in part of rhombohedral CuGaO2 (R-3m). The closest distance of Cu-Cu found in a-b plane is 2.9770(10)Å and one of Cu-O is 1.84710 Å along with the c-axis. On the other hand, the closest distance of Ga-Ga is 2.9770(10) Å and the Ga-O distance in GaO6 octahedron is 1.9957(5) Å. It is also seen that oxygen has fourfold coordination with one Cu and three Ga. Cu is combined with two oxygens along with the *c*-axis and Ga has six-fold coordination with oxygens.


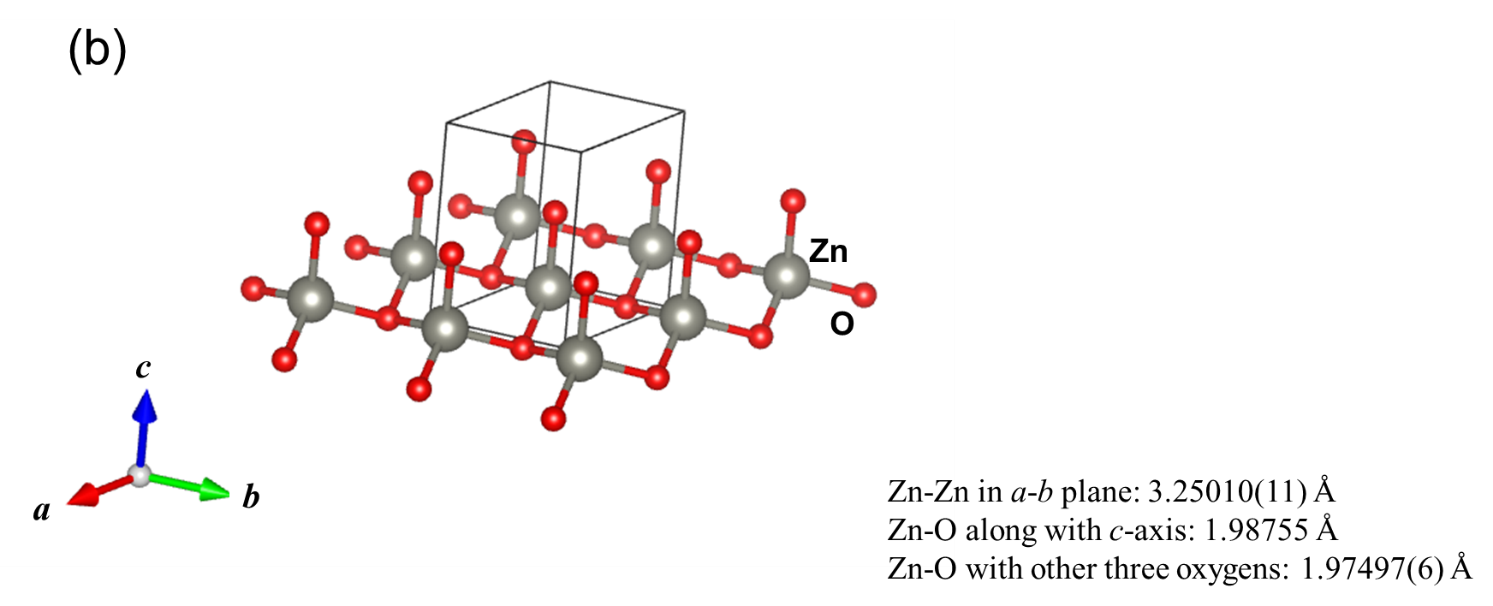


**Fig.S1(b)** Extracted crystal structure of wurtzite(hexagonal) ZnO (P63/mmc). Grey and red balls

show Zn and O elements, respectively. The lattice parameters are taken from ICDD PDF 04-003-2106.

As for ZnO shown in **Fig.S1(b)**, the closest distance of Zn-Zn found in *a*-*b* plane is 3.25010(11) Å. The Zn-O distance along with the *c*-axis is 1.97497(6) Å, which Zn element has bonds with the other three oxygen in a length of 1.98755(4). As it is well known, Zn has fourfold coordination with oxygens and O has four neighboring Zn elements within a distance < 1.99 Å.

**Table S1** Sample names and synthesis conditions for CuGaO2/ZnO hybrids

| Sample name | CGO used | Mass of Zn(ac)2·2H2O | Nominal [Zn]/[Cu] ratio |
| --- | --- | --- | --- |
| CZ1 | CGO1 | 0.18 g | 2.75 |
| CZ2 | CGO1 | 0.36 g | 5.5 |
| CZ3 | CGO1 | 0.72 g | 11 |
| CZ4 | CGO2 | 1.08 g | 16.5 |

(The sample preparation of CuGaO2/ZnO hybrids are given in the maintext.)

**Table S2** XRD peak assignment for the CZ3 sample

| No. | XRD peak position | Assignment (*h* *k* *l*) | | | | | |
| --- | --- | --- | --- | --- | --- | --- | --- |
| CuGaO2, rhombohedral | ZnO, hexagonal | CuGa2O4, cubic | ZnCu2O4, tetragonal | Cu2O, cubic | Cu(fcc),  fcc or hexa |
| 1 | 13.961 | n.a. | n.a. | n.a. | n.a. | n.a. | n.a. |
| 2 | 15.465 | 0 0 3 |  |  |  |  |  |
| 3 | 28.132 |  |  |  | 1 1 2 |  |  |
| 4 | 28.600 |  |  |  | 1 0 3 |  |  |
| 5 | 30.970 |  |  | 2 2 0 |  |  |  |
| 6 | 31.240 | 0 0 6 |  |  |  |  |  |
| 7 | 31.741 |  | 1 0 0 |  |  |  |  |
| 8 | 32.610 |  |  |  |  |  |  |
| 9 | 34.382 |  | 0 0 2 |  |  |  |  |
| 10 | 35.752 | 1 0 1 |  |  |  |  |  |
| 11 | 36.220 | 0 1 2 | 1 0 1 |  |  | 1 1 1 |  |
| 12 | 40.866 | 1 0 4 |  |  |  |  |  |
| 13 | 42.671 |  |  |  |  | 2 0 0 |  |
| 14 | 43.306 |  |  |  |  |  | 1 1 1 (fcc) |
| 15 | 47.517 |  | 1 0 2 |  |  |  |  |
| 16 | 50.692 |  |  |  |  |  | 2 0 0 (fcc) |
| 17 | 56.173 | 0 1 8 |  |  |  |  |  |
| 18 | 56.574 |  | 1 1 0 |  |  |  |  |
| 19 | 60.618 |  |  |  |  |  | 1 0 4 (hexa) |
| 20 | 61.621 |  |  |  |  | 2 2 0 |  |
| 21 | 62.390 | 1 1 0 |  |  |  |  |  |
| 22 | 62.824 |  | 1 0 3 |  |  |  |  |
| 23 | 65.164 | 1 0 10 |  |  |  |  |  |
| 24 | 66.334 |  | 2 0 0 |  |  |  |  |
| 25 | 67.905 |  | 1 1 2 |  |  |  |  |
| 26 | 69.074 |  | 2 0 1 |  |  |  |  |

n.a.: not assigned


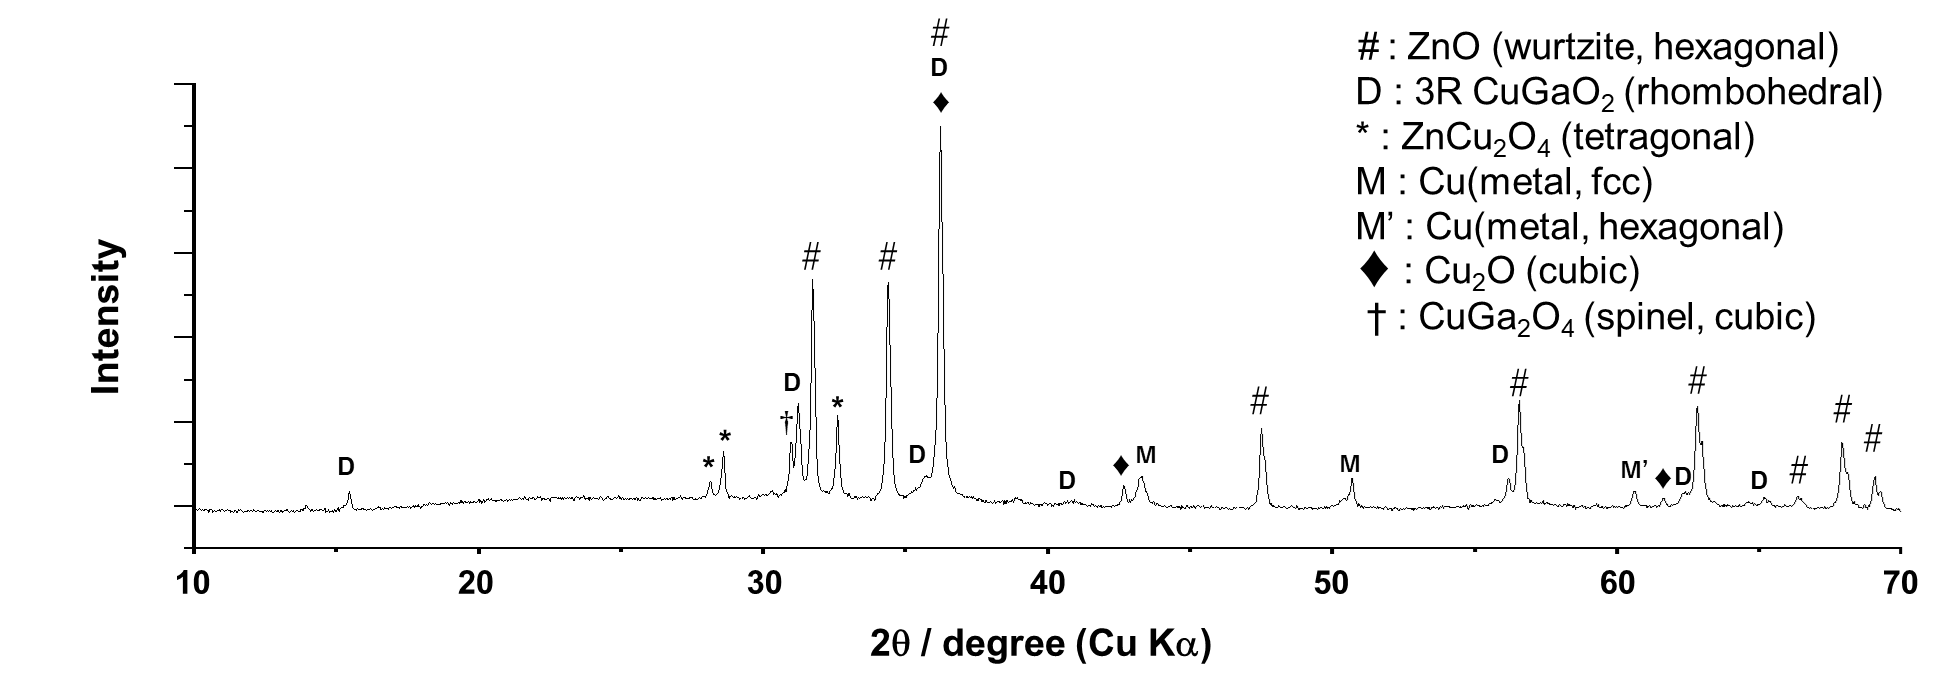


**Fig.S2** XRD pattern of CZ3 sample (after the H2 annealing process) and assignment of the corresponding crystals.

**Fig.S3** XRD patterns of CuGaO2/ZnO hybrids of CZ1-4 before the H2 annealing process. (#:wurtzite ZnO, D:rhombohedral(3R) CuGaO2).


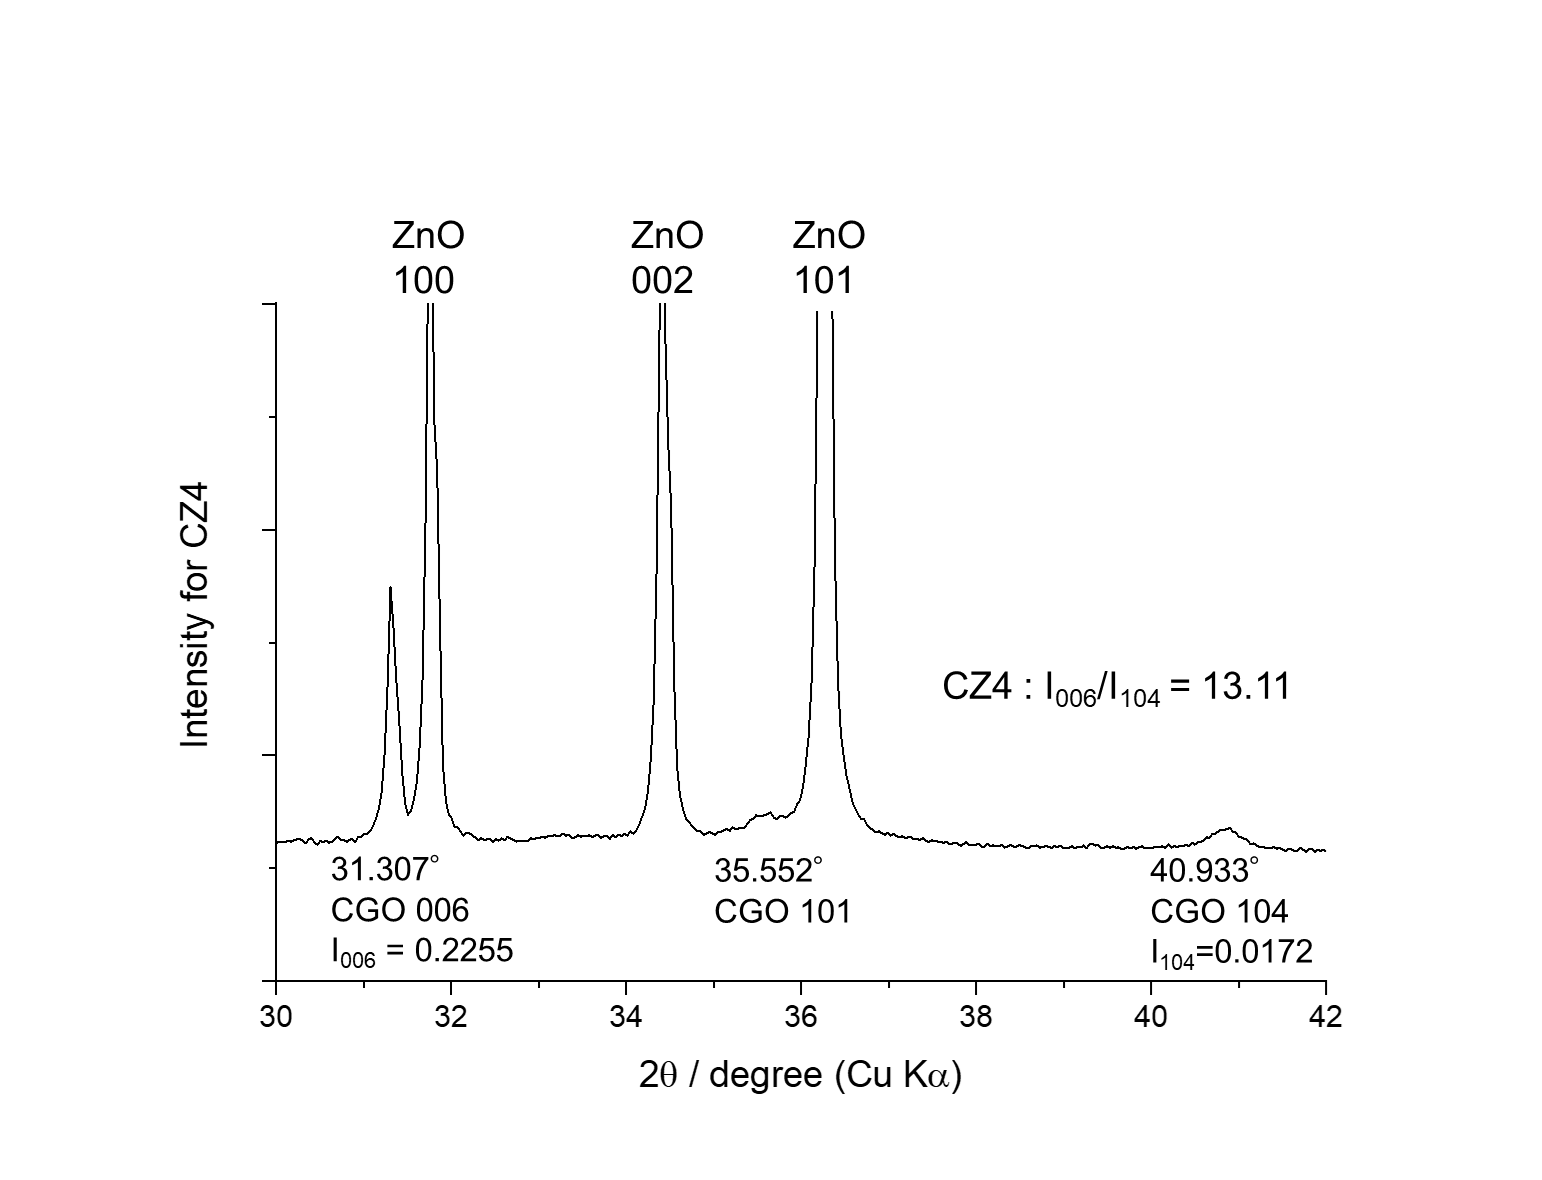


**Fig.S4** XRD pattern (magnified) of CZ4 sample after the H2 annealing process.


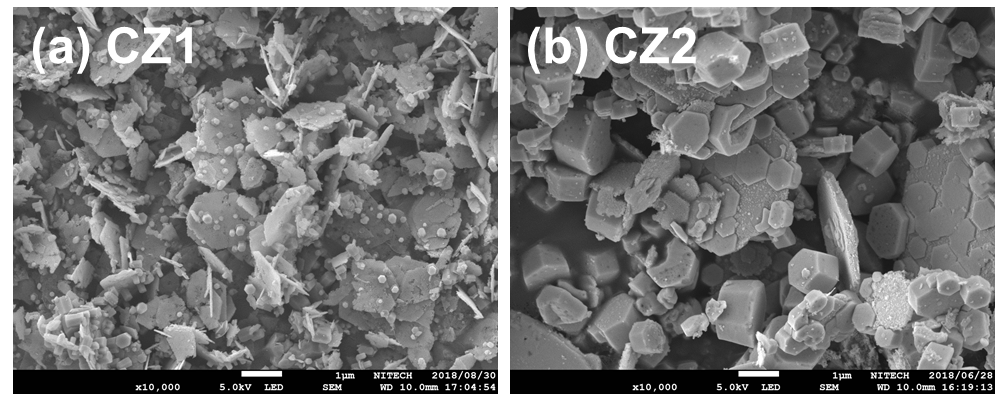


**Fig.S5** SEM images of the CZ1 (a) and CZ2 (b) samples.


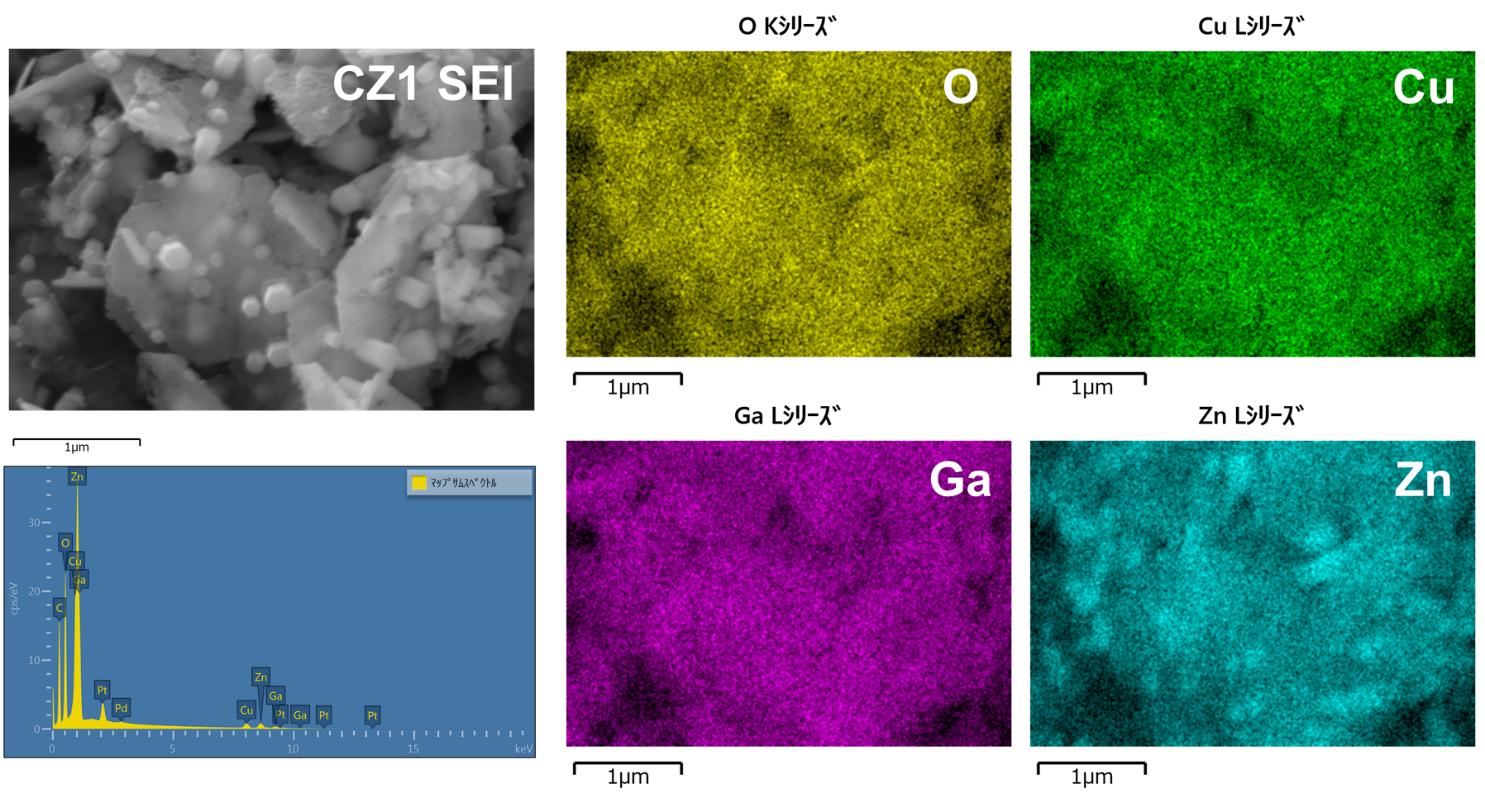


**Fig.S6** SEM-EDS results of the CZ1 sample.


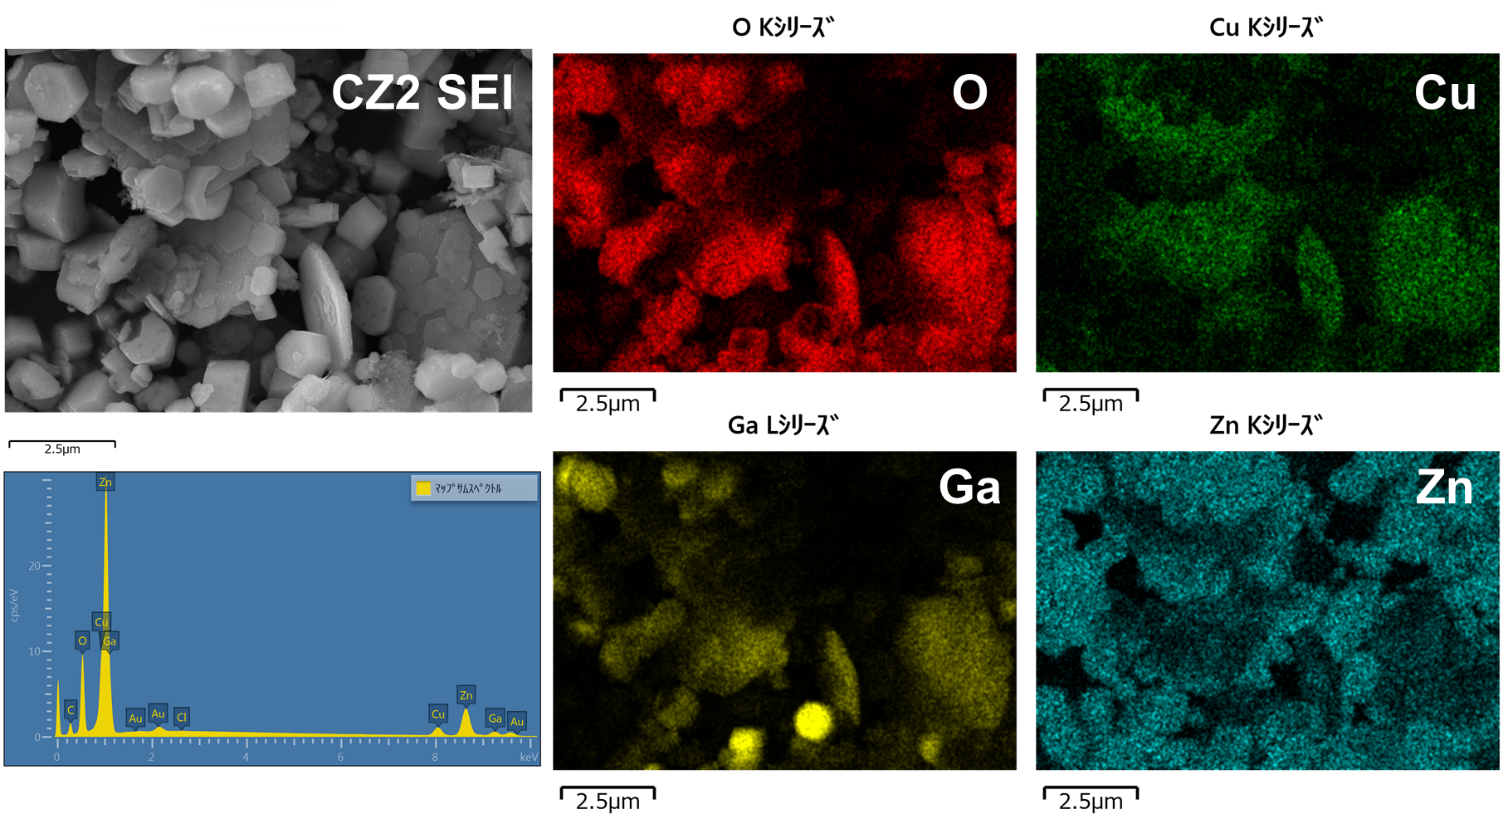


**Fig.S7** SEM-EDS results of the CZ2 sample.


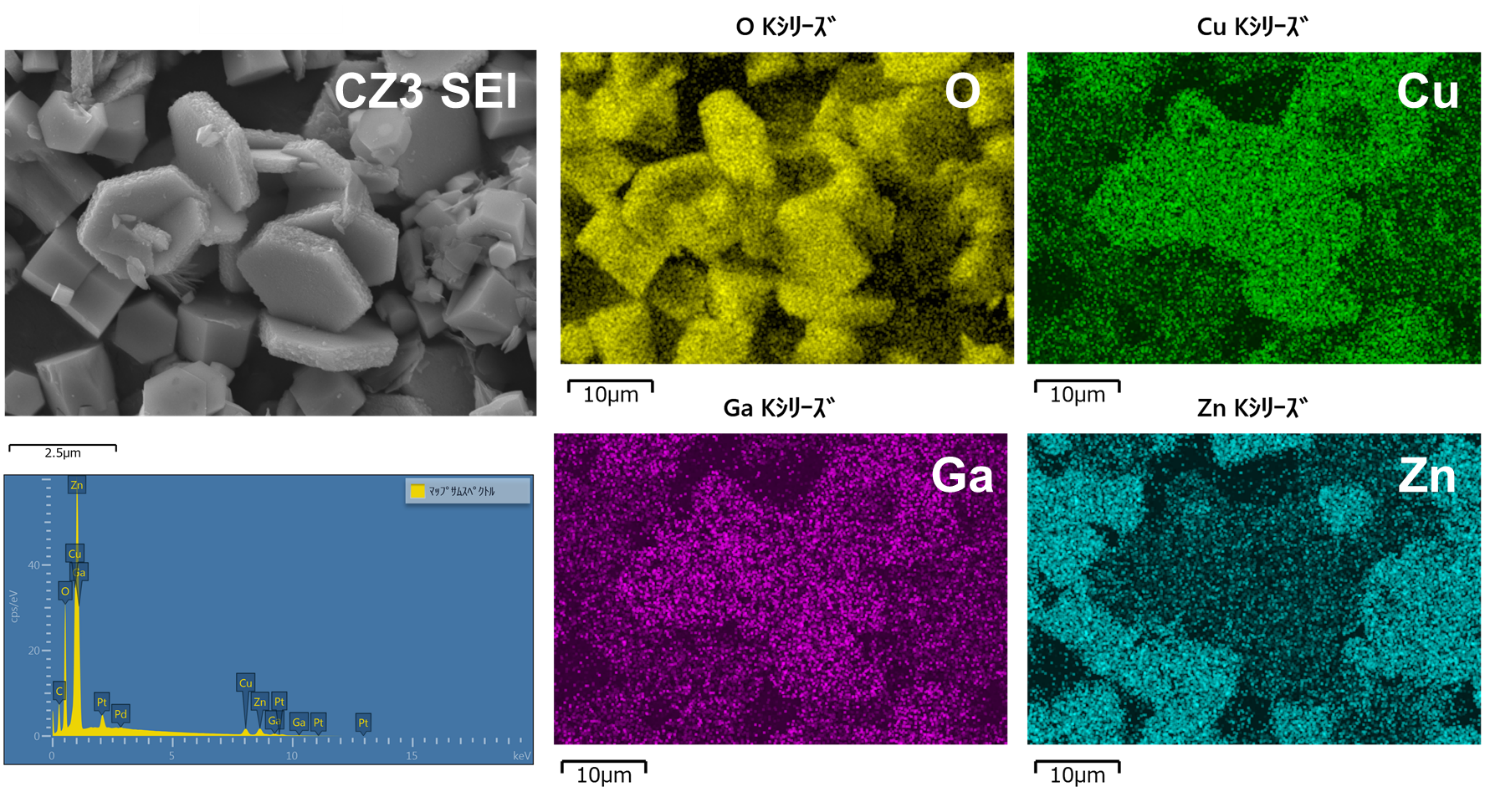


**Fig.S8** SEM-EDS results of the CZ3 sample.


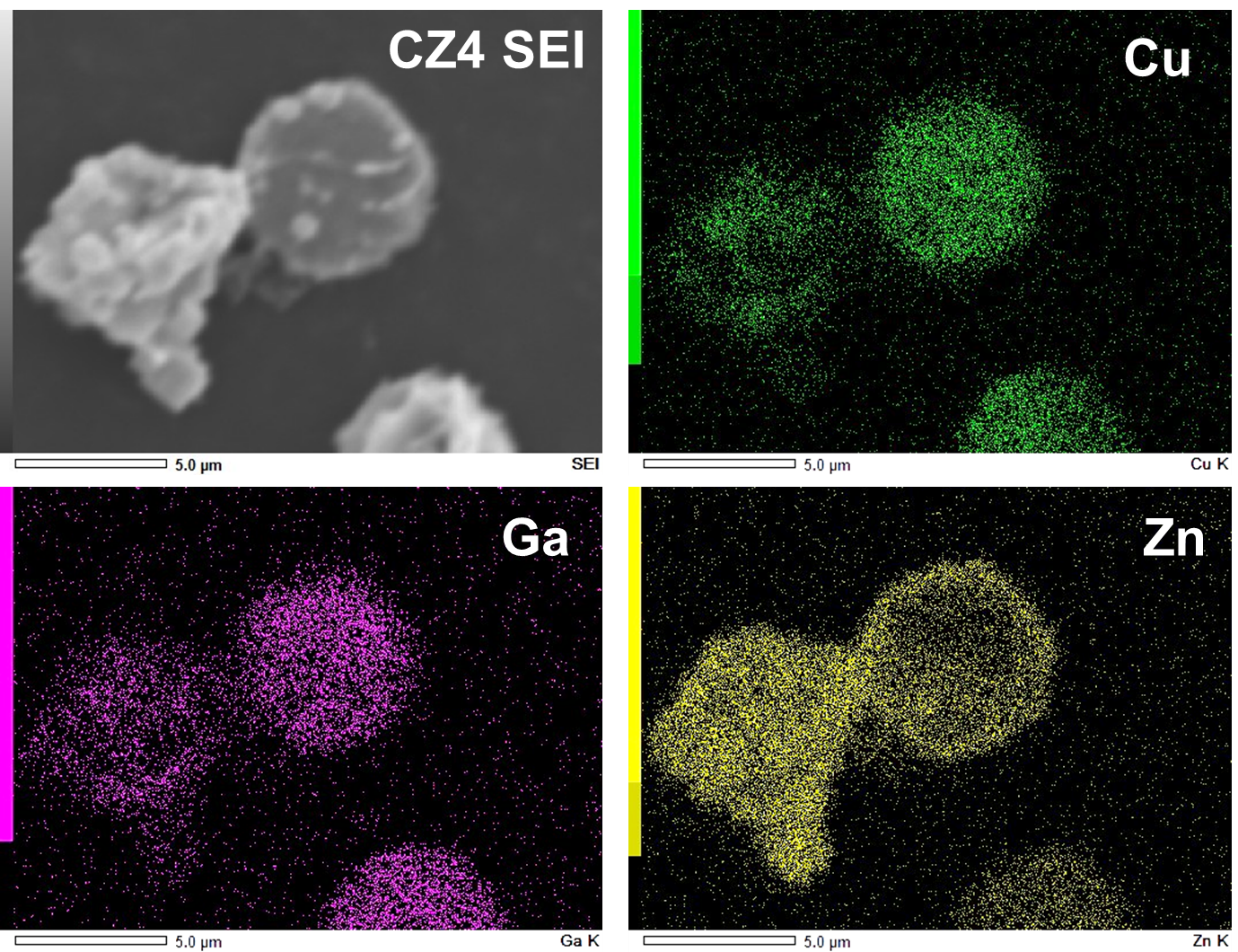


**Fig.S9** SEM-EDS results of the CZ4 sample, which are taken, for comparison with **Fig.S5-7**, from the literature (M. Choi, S. Yagi, Y. Ohta, K. Kido and T. Hayakawa, *J. Phys. Chem. Solids,* 150 (2021) 109845).

**Fig.S10** Comparison of XRD patterns for two CuGaO2/ZnO hybris synthesized with the same [Zn]/[Cu] ratio (=11) but by use of the different base crystals, CGO1 and CGO2 (#:wurtzite ZnO, D:rhombohedral(3R) CuGaO2). Both the hybrids were annealed in the H2 atmosphere. The CGO1 particles used were mainly 1~3 mm in size, while the CGO2 particles with the size bigger than 3 mm, typically 5~8 mm were obtained, meaning that the specific surface area (SSA) of the particles of CGO1 was higher, and thus that more oxygen molecules would possibly be adsorbed on CGO1, which make it more likely that the partial decomposition to CuO and Ga2O3 took place on CGO1. This would make it possible to form the ZnCu2O4 and CuGa2O4 in CZ3 by **Reactions 1 and 2** given in the maintext.


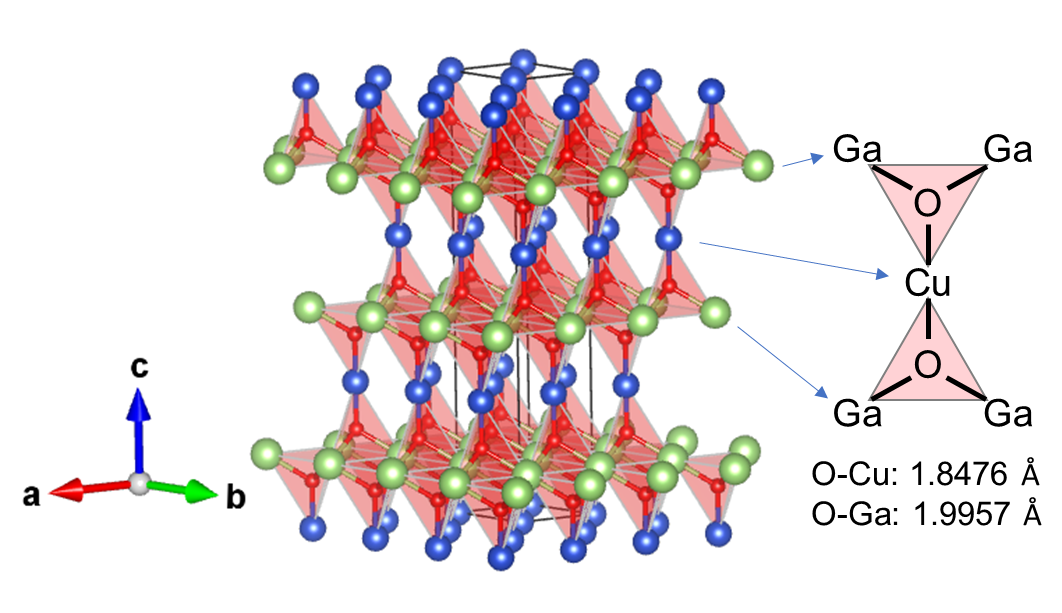


**Fig.S11** Overview of OCuGa3 polyhedra in 3R CuGaO2 structure.
